# Supplementary material for: Cortical Location of Language Function May Differ between Languages While White Matter Pathways Are Similar in Brain Lesion Patients
Source: MDPI journal article supplement (doi:10.3390/brainsci13081141), 2023-07-29
Supplement: s1 [file s1]

| Stimulation Site | (1) Balto-Slavic and Indo-European Languages |          | (2) Languages of Bilingual Patients |          |
|------------------|----------------------------------------------|----------|-------------------------------------|----------|
|                  | <i>U</i>                                     | <i>p</i> | <i>Z</i>                            | <i>p</i> |
| 1                | 213.50                                       | .026**   | -1.725                              | .084*    |
| 2                | 274.50                                       | .531     | -.431                               | .667     |
| 3                | 281.50                                       | .632     | -1.579                              | .114     |
| 4                | 295.00                                       | .891     | -1.786                              | .074*    |
| 5                | 280.00                                       | .630     | -1.363                              | .173     |
| 6                | 296.00                                       | .923     | -1.414                              | .157     |
| 7                | 284.00                                       | .714     | -1.754                              | .079*    |
| 8                | 290.50                                       | .815     | -.863                               | .388     |
| 9                | 282.50                                       | .660     | -.312                               | .755     |
| 10               | 281.00                                       | .624     | -1.131                              | .258     |
| 11               | 271.00                                       | .427     | -1.089                              | .276     |
| 12               | 287.50                                       | .747     | -.539                               | .590     |
| 13               | 273.50                                       | .511     | -.632                               | .527     |
| 14               | 243.50                                       | .201     | -.184                               | .854     |
| 15               | 239.00                                       | .070*    | -.447                               | .655     |
| 16               | 252.50                                       | .221     | < .001                              | 1.000    |
| 17               | 211.50                                       | .046**   | -.634                               | .526     |
| 18               | 240.50                                       | .151     | -1.511                              | .131     |
| 19               | 291.50                                       | .822     | -.730                               | .465     |
| 20               | 236.50                                       | .109     | -.073                               | .942     |
| 21               | 251.50                                       | .211     | -1.052                              | .293     |
| 22               | 273.00                                       | .535     | < .001                              | 1.000    |
| 23               | 267.50                                       | .450     | < .001                              | 1.000    |
| 24               | 241.00                                       | .145     | -.447                               | .655     |
| 25               | 222.00                                       | .027**   | -.323                               | .746     |
| 26               | 246.00                                       | .194     | -.677                               | .498     |
| 27               | 273.50                                       | .482     | -1.903                              | .057*    |
| 28               | 291.50                                       | .846     | -.577                               | .564     |
| 29               | 250.00                                       | .209     | -.108                               | .914     |

|    |        |       |        |        |
|----|--------|-------|--------|--------|
| 30 | 262.00 | .360  | -.682  | .495   |
| 31 | 248.00 | .206  | -.302  | .763   |
| 32 | 276.50 | .582  | -1.786 | .074*  |
| 33 | 278.50 | .568  | -1.069 | .285   |
| 34 | 270.00 | .410  | -1.194 | .233   |
| 35 | 252.50 | .243  | -1.342 | .180   |
| 36 | 280.00 | .624  | -.944  | .345   |
| 37 | 286.00 | .717  | -.272  | .785   |
| 38 | 288.50 | .772  | -1.476 | .140   |
| 39 | 229.50 | .100* | -2.264 | .024** |
| 40 | 244.00 | .137  | -1.054 | .292   |
| 41 | 260.50 | .308  | -1.289 | .197   |
| 42 | 282.50 | .652  | -.272  | .785   |
| 43 | 272.00 | .481  | -.552  | .581   |
| 44 | 293.00 | .866  | -1.550 | .121   |
| 45 | 268.50 | .446  | -1.236 | .216   |
| 46 | 270.00 | .409  | -2.414 | .016** |

**Supplementary Table S1: Comparison of Error Rates Between (1) Balto-Slavic and Indo-European Languages and (2) Languages of Bilingual Patients**

The table shows the results of the Mann-Whitney U tests comparing the error rates between Balto-Slavic (N = 24) and Indo-European languages (N = 25) and the results of the Wilcoxon Signed Rank Z tests comparing the error rates between the two spoken languages of bilingual patients (N = 18). One asterisk (\*) marks differences that were significant at  $\alpha = .10$ . Two asterisks (\*\*) mark differences that were significant at  $\alpha = .05$ . After correction for multiple testing, no significant differences were found.

| Stimulation<br>Site | Subcortical Pathway Volumes |        |      |          |        |       |
|---------------------|-----------------------------|--------|------|----------|--------|-------|
|                     | FA = .10                    |        |      | FA = .15 |        |       |
|                     | IFOF                        | SLF/AF | FAT  | IFOF     | SLF/AF | FAT   |
| <b>1</b>            | .11                         | -.29   | .01  | .03      | -.29   | -.18  |
| <b>2</b>            | .02                         | < .01  | .04  | -.07     | -.29   | .18   |
| <b>3</b>            | .19                         | -.15   | -.02 | .13      | -.37   | .22   |
| <b>4</b>            | .32                         | .03    | .35  | .33      | .24    | .11   |
| <b>5</b>            | -.22                        | -.14   | -.10 | -.25     | -.22   | -.28  |
| <b>6</b>            | -.21                        | -.48*  | -.05 | -.27     | -.60*  | -.25  |
| <b>7</b>            | .03                         | -.07   | .13  | -.09     | -.13   | .15   |
| <b>8</b>            | -.18                        | -.03   | -.09 | -.28     | .01    | -.01  |
| <b>9</b>            | .31                         | .01    | .31  | .34      | .17    | .20   |
| <b>10</b>           | -.29                        | -.10   | -.08 | -.47*    | -.47*  | -.17  |
| <b>11</b>           | .18                         | -.02   | -.03 | .22      | .10    | -.25  |
| <b>12</b>           | -.18                        | -.28   | .06  | < .01    | -.26   | .01   |
| <b>13</b>           | .03                         | -.19   | -.04 | -.14     | -.25   | .03   |
| <b>14</b>           | .25                         | .13    | .30  | .29      | .28    | .22   |
| <b>15</b>           | .13                         | -.09   | -.02 | -.11     | -.23   | .06   |
| <b>16</b>           | .13                         | -.30   | .03  | .25      | -.07   | -.17  |
| <b>17</b>           | .21                         | .13    | .18  | -.01     | -.15   | .21   |
| <b>18</b>           | -.33                        | -.18   | -.29 | -.45*    | -.26   | -.32  |
| <b>19</b>           | -.30                        | -.43*  | -.18 | -.35     | -.53*  | -.38  |
| <b>20</b>           | -.23                        | -.13   | -.03 | -.19     | -.41   | .03   |
| <b>21</b>           | .02                         | -.11   | -.04 | -.04     | -.08   | .05   |
| <b>22</b>           | .24                         | -.16   | -.06 | .02      | -.30   | -.09  |
| <b>23</b>           | .23                         | .09    | .01  | -.05     | -.20   | < .01 |
| <b>24</b>           | .21                         | -.15   | .11  | .10      | -.07   | .21   |
| <b>25</b>           | .21                         | -.04   | .22  | .11      | -.37   | .36   |
| <b>26</b>           | .02                         | -.11   | .12  | .02      | -.07   | .10   |
| <b>27</b>           | -.35                        | -.10   | -.05 | -.38     | -.31   | -.22  |
| <b>28</b>           | -.39                        | -.12   | .07  | -.29     | -.24   | .05   |
| <b>29</b>           | -.13                        | -.29   | -.19 | -.20     | -.36   | -.18  |
| <b>30</b>           | .29                         | .26    | .18  | .06      | .15    | .16   |

|           |       |      |      |      |      |      |
|-----------|-------|------|------|------|------|------|
| <b>31</b> | .22   | -.02 | -.06 | .01  | -.14 | .19  |
| <b>32</b> | .24   | -.34 | .11  | .21  | -.31 | .11  |
| <b>33</b> | < .01 | .01  | .04  | -.03 | -.23 | -.13 |
| <b>34</b> | -.02  | -.23 | .22  | .18  | -.23 | .23  |
| <b>35</b> | .26   | -.01 | .14  | .26  | .06  | .01  |
| <b>36</b> | .01   | -.25 | -.22 | -.16 | -.21 | -.23 |
| <b>37</b> | .07   | -.06 | .10  | .04  | .04  | .09  |
| <b>38</b> | .10   | -.15 | .46* | .26  | -.34 | .38  |
| <b>39</b> | .20   | -.11 | .26  | .15  | -.23 | .10  |
| <b>40</b> | .40   | .06  | .16  | .37  | .19  | .18  |
| <b>41</b> | .54*  | .02  | .36  | .60* | .29  | .18  |
| <b>42</b> | .13   | -.07 | -.01 | -.12 | -.39 | -.06 |
| <b>43</b> | .18   | .17  | .31  | .23  | .16  | -.05 |
| <b>44</b> | .21   | -.22 | -.12 | .18  | -.08 | -.03 |
| <b>45</b> | -.30  | -.06 | -.09 | -.28 | -.16 | -.10 |
| <b>46</b> | .25   | -.28 | -.09 | .20  | -.25 | -.05 |

**Supplementary Table S2: Correlations between error rates and relative subcortical pathway volumes in Balto-Slavic languages**

The table shows the results of the Spearman's correlations between error rates and relative pathway volumes of the IFOF, SLF/AF and FAT in the Balto-Slavic language group. The asterisk (\*) marks correlations that were significant at  $\alpha = .05$ . Abbreviations: FA = fractional anisotropy, IFOF = inferior fronto-occipital fascicle, SLF/AF = superior longitudinal fascicle/arcuate fascicle, FAT = frontal aslant tract

| Stimulation Site | Subcortical Pathway Volumes |        |      |          |        |      |
|------------------|-----------------------------|--------|------|----------|--------|------|
|                  | FA = .10                    |        |      | FA = .15 |        |      |
|                  | IFOF                        | SLF/AF | FAT  | IFOF     | SLF/AF | FAT  |
| <b>1</b>         | .11                         | -.29   | .01  | .13      | .12    | .06  |
| <b>2</b>         | .02                         | < .01  | .04  | -.03     | .02    | .01  |
| <b>3</b>         | .19                         | -.15   | -.02 | -.09     | .16    | .31  |
| <b>4</b>         | .32                         | .03    | .35  | -.25     | -.02   | .31  |
| <b>5</b>         | -.22                        | -.14   | -.10 | .10      | .32    | .18  |
| <b>6</b>         | -.21                        | -.48*  | -.05 | .22      | -.08   | .29  |
| <b>7</b>         | .03                         | -.07   | .13  | .32      | .45*   | .06  |
| <b>8</b>         | -.18                        | -.03   | -.09 | -.30     | .13    | .24  |
| <b>9</b>         | .31                         | .01    | .31  | .02      | .26    | .33  |
| <b>10</b>        | -.29                        | .10    | -.08 | .07      | .20    | .13  |
| <b>11</b>        | .18                         | -.02   | -.03 | .10      | -.12   | -.03 |
| <b>12</b>        | -.18                        | -.28   | .06  | .34      | .18    | -.31 |
| <b>13</b>        | .03                         | -.19   | -.04 | .02      | .14    | -.21 |
| <b>14</b>        | .25                         | .13    | .30  | .08      | .37    | -.14 |
| <b>15</b>        | .13                         | -.09   | -.02 | -.05     | -.23   | .20  |
| <b>16</b>        | .13                         | -.30   | .03  | .39      | .26    | .12  |
| <b>17</b>        | .21                         | .13    | .18  | .37      | .07    | -.24 |
| <b>18</b>        | -.33                        | -.18   | -.29 | -.01     | -.04   | .04  |
| <b>19</b>        | -.30                        | -.43*  | -.18 | .03      | .13    | .35  |
| <b>20</b>        | -.23                        | -.13   | -.03 | .22      | .28    | -.17 |
| <b>21</b>        | .02                         | -.11   | -.04 | .47*     | .41*   | -.10 |
| <b>22</b>        | .24                         | -.16   | -.06 | .04      | -.06   | .18  |
| <b>23</b>        | .23                         | .09    | .01  | .34      | .14    | .09  |
| <b>24</b>        | .21                         | -.15   | .11  | .21      | .17    | .42* |
| <b>25</b>        | .21                         | -.04   | .22  | -.03     | .14    | .10  |
| <b>26</b>        | .02                         | -.11   | .12  | .19      | .10    | -.15 |
| <b>27</b>        | -.35                        | -.10   | -.05 | .20      | .16    | -.09 |
| <b>28</b>        | -.39                        | -.12   | .07  | .29      | .08    | .24  |
| <b>29</b>        | -.13                        | -.29   | -.19 | .31      | -.04   | .19  |
| <b>30</b>        | .29                         | .26    | .18  | .10      | .25    | .22  |

|           |       |      |      |       |      |       |
|-----------|-------|------|------|-------|------|-------|
| <b>31</b> | .22   | -.02 | -.06 | -.17  | .09  | .37   |
| <b>32</b> | .24   | -.34 | .11  | .25   | -.31 | .04   |
| <b>33</b> | < .01 | .01  | .04  | .19   | .18  | .15   |
| <b>34</b> | -.02  | -.23 | .22  | .47*  | .18  | -.20  |
| <b>35</b> | .26   | -.01 | .14  | .19   | .23  | -.04  |
| <b>36</b> | .01   | -.25 | -.22 | .13   | .44* | .45*  |
| <b>37</b> | .07   | -.06 | .10  | .22   | .11  | .02   |
| <b>38</b> | .10   | -.15 | .46* | -.30  | .06  | .59*  |
| <b>39</b> | .20   | -.11 | .26  | .11   | .11  | .26   |
| <b>40</b> | .40   | .06  | .16  | -.30  | -.21 | < .01 |
| <b>41</b> | .54*  | .02  | .36  | .15   | .02  | .14   |
| <b>42</b> | .13   | -.07 | -.01 | -.11  | .11  | .51*  |
| <b>43</b> | .18   | .17  | .31  | < .01 | .19  | .52*  |
| <b>44</b> | .21   | -.22 | -.12 | -.03  | -.08 | .29   |
| <b>45</b> | -.30  | -.06 | -.09 | .07   | .11  | .47*  |
| <b>46</b> | .25   | -.28 | -.09 | -.19  | .17  | .06   |

**Supplementary Table S3: Correlations between error rates and subcortical pathway volumes in Indo-European languages**

The table shows the results of the Spearman's correlations between error rates and relative pathway volumes of the IFOF, SLF/AF and FAT in the Indo-European language group. The asterisk (\*) marks correlations that were significant at  $\alpha = .05$ . Abbreviations: FA = fractional anisotropy, IFOF = inferior fronto-occipital fascicle, SLF/AF = superior longitudinal fascicle/arcuate fascicle, FAT = frontal aslant tract
